# Supplementary material for: Comment on Growth responses of trees and understory plants to nitrogen fertilization in a subtropical forest in China by Tian et al. (2017)
Source: Copernicus journal article supplement (doi:10.5194/bg-2017-358), 2017-08-25
Supplement: Supplementary file 1 [file bg-2017-358-supplement.pdf]

## Supplemental information

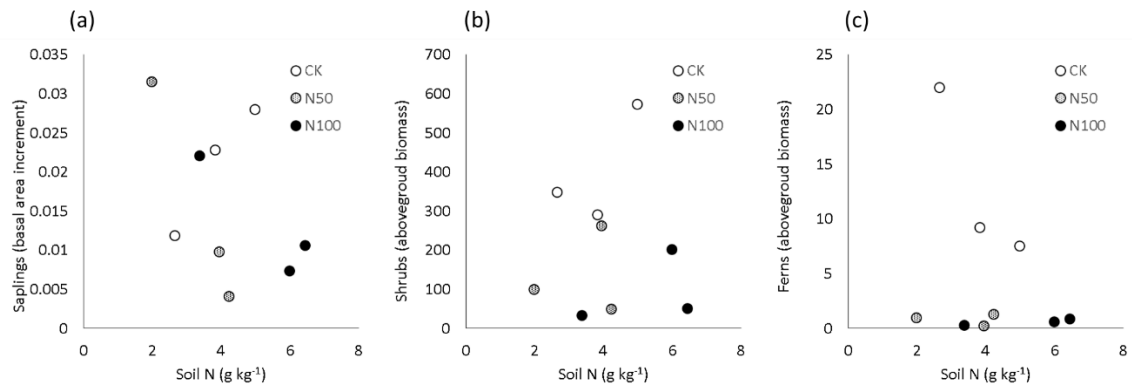

**Fig. S1. Relationship between soil N (soil total N) and (a) saplings (basal area increment), (b) shrubs (aboveground biomass), and (c) ferns (aboveground biomass). The figures were drawn using data in Tian et al. (2017)'s Supplement.**
